# Supplementary material for: Natural Medicines for the Treatment of Epilepsy: Bioactive Components, Pharmacology and Mechanism
Source: PubMed Central journal article supplement (PMC7969896; doi:10.3389/fphar.2021.604040), 2021-03-04
Supplement: datasheet1.pdf [file datasheet1.pdf]

## Supplementary Material

### 1.1 Supplementary Figures

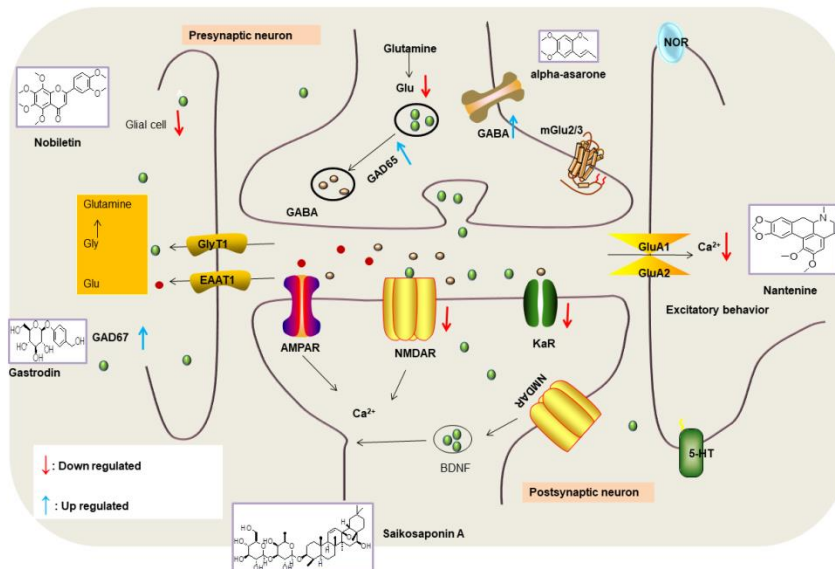

**Figure 1.** Effects of natural drugs on receptor pathway.  $\alpha$ -amino-3-hydroxy-5-methyl-4-isoxazolepropionic acid receptor (AMPA), brain-derived neurotrophic factor (BDNF), excitatory amino acid transporter (EAAT),  $\gamma$ -aminobutyric acid (GABA), glutamate decarboxylase (GAD), glutamate (Glu), glycine (Gly), N-methyl-D-aspartate receptor (NMDAR)

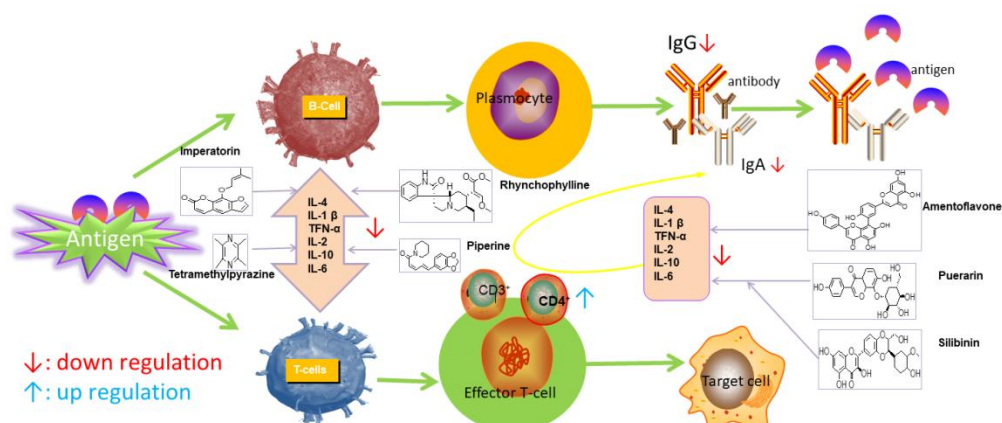

**Figure 2.** Effects of natural drugs on immune system. Interleukin 1 $\beta$  (IL-1 $\beta$ ), interleukin 6 (IL-6), tumor necrosis factor- $\alpha$  (TNF- $\alpha$ )

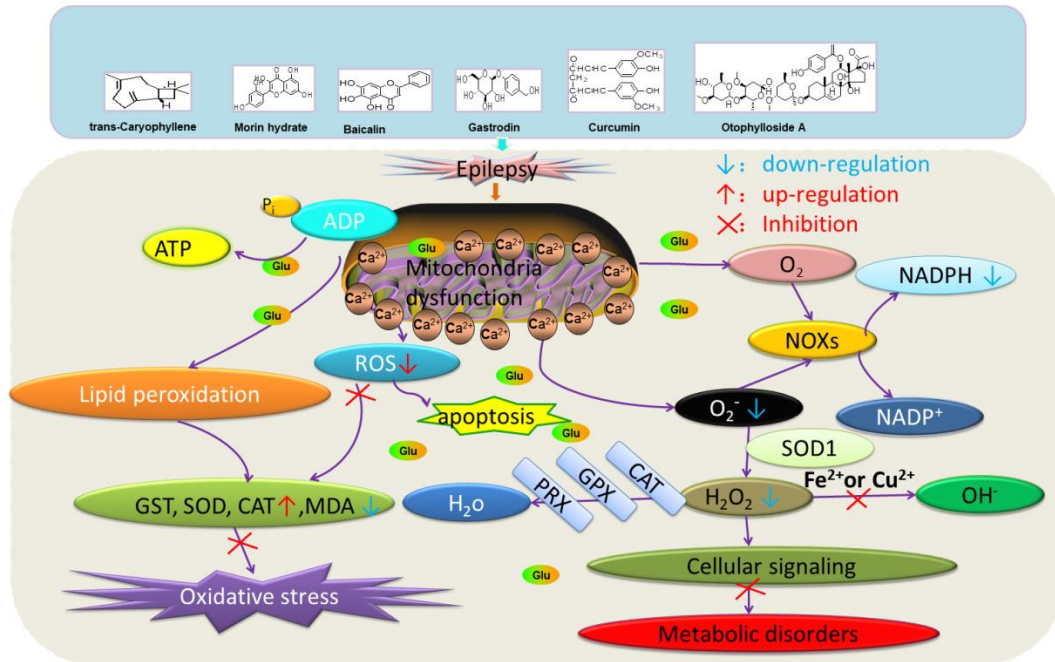

**Figure 3.** Effects of natural drugs on mitochondrial damage and oxidative stress. Adenosine triphosphate (ATP), adenosine diphosphate (ADP), catalase (CAT), glutathione S-transferase (GST), glutathione peroxidase (GPX), peroxiredoxin (PRX), malondialdehyde (MDA), reactive oxygen species (ROS), superoxide dismutase (SOD), nicotinamide adenine dinucleotide phosphate (NADPH) oxidase (NOXs)

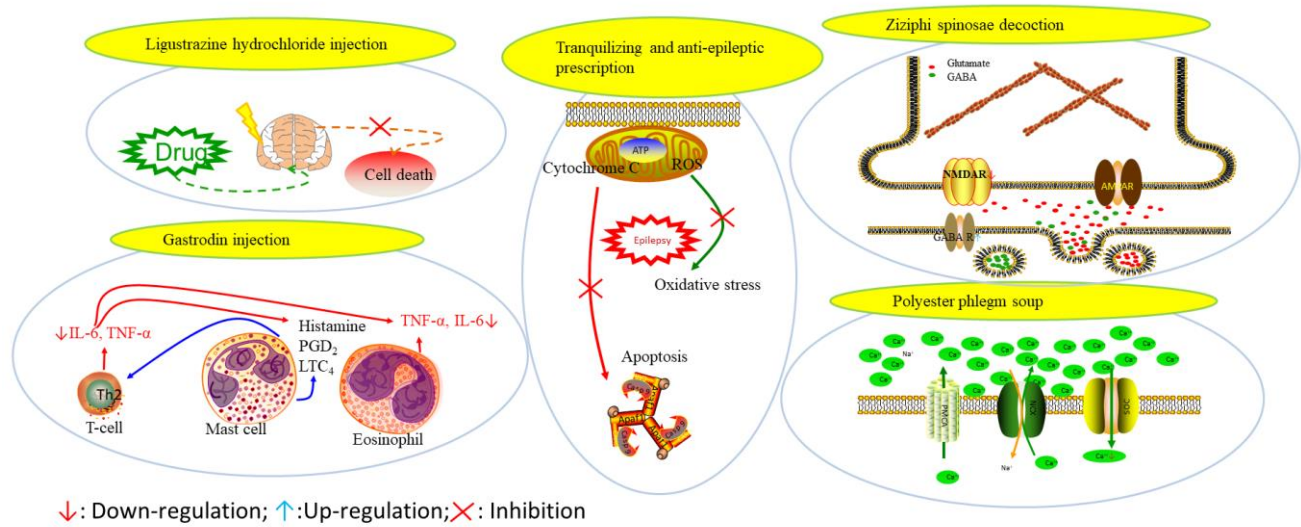

**Figure 4.** The therapeutic mechanism of integrated Chinese and Western medicine. Interleukin 6 (IL-6), reactive oxygen species (ROS), tumor necrosis factor- $\alpha$  (TNF- $\alpha$ ), prostaglandin D2 (PGD<sub>2</sub>), leukotriene C4 (LTC<sub>4</sub>),  $\gamma$ -aminobutyric acid (GABA)
